# Supplementary material for: Two-Year Responses of Renal Function to First Occupational Lead Exposure
Source: PubMed Central journal article supplement — Kidney Int Rep. 2022 Mar 26;7(6):1198–209. doi: 10.1016/j.ekir.2022.03.014 (PMC9171623; doi:10.1016/j.ekir.2022.03.014), 2022-03-26
Supplement: mmc1.pdf [file mmc1.pdf]

## SUPPLEMENTARY MATERIALS

### *Two-year responses of renal function to first occupational lead exposure*

*Yu-Ling Yu, Lutgarde Thijs, Dong-Mei Wei, Jesus D. Melgarejo, Cai-Guo Yu, Wen-Yi Yang, Harry A. Roels, Zhen-Yu Zhang, Tim S. Nawrot, Jan A. Staessen*

| <b>Table of contents</b>                                                                                                                                                                                                                 | <b>page</b> |
|------------------------------------------------------------------------------------------------------------------------------------------------------------------------------------------------------------------------------------------|-------------|
| <b>Expanded methods</b>                                                                                                                                                                                                                  | 2-7         |
| <b>Table S1</b> Chronic Kidney Disease Epidemiology Collaboration equations for estimating glomerular filtration rates derived from serum creatinine, serum cystatin C and both                                                          | 8           |
| <b>Table S2</b> Baseline characteristics of workers followed up and not followed up                                                                                                                                                      | 9           |
| <b>Table S3</b> Red blood cell biomarkers changes from baseline to last follow-up by quartiles of the distribution of the follow-up-to-baseline blood lead concentration ratio                                                           | 10          |
| <b>Table S4</b> Renal function at baseline by quartiles of the distribution of the follow-up-to-baseline blood lead ratio                                                                                                                | 11          |
| <b>Table S5</b> Renal function at follow-up by quartiles of the distribution of the follow-up-to-baseline blood lead ratio                                                                                                               | 12          |
| <b>Table S6</b> Association between changes in red blood cell biomarkers and in blood lead                                                                                                                                               | 13          |
| <b>Table S7</b> Association between changes in renal function and in blood lead in 223 workers not on antihypertensive drug treatment                                                                                                    | 14          |
| <b>Table S8</b> Associations between renal function and blood lead at baseline and at last follow-up                                                                                                                                     | 15          |
| <b>Table S9</b> Association between changes in renal function and in blood lead stratified by the median baseline age                                                                                                                    | 16          |
| <b>Table S10</b> Association between changes in renal function and in blood lead stratified by the median baseline blood lead                                                                                                            | 17          |
| <b>Table S11</b> Association between changes in renal function and in blood lead stratified by the median cumulative blood lead index                                                                                                    | 18          |
| <b>Figure S1</b> Distributions of blood lead at baseline and last follow-up and of the last-follow-up-to-baseline blood lead ratio                                                                                                       | 19          |
| <b>Figure S2</b> Linear associations between baseline blood lead (bBL) and the last-follow-up-to-baseline BL ratio (rBL), between bBL and the residual of rBL regressed on bBL, and between rBL and the residual of bBL regressed on rBL | 20          |

|                  |                                                                                                                                                                                             |    |
|------------------|---------------------------------------------------------------------------------------------------------------------------------------------------------------------------------------------|----|
| <b>Figure S3</b> | Boxplots showing the distributions of the glomerular filtration rate derived from serum creatinine, serum cystatin C, or both serum creatinine and cystatin C by study phase and work shift | 21 |
| <b>Figure S4</b> | Heat maps relating the changes in glomerular filtration to their baseline values and the baseline blood lead concentration                                                                  | 22 |
| <b>Figure S5</b> | Heat maps relating the changes in glomerular filtration to their baseline values and the follow-up-to-baseline blood lead concentration ratio                                               | 23 |

## **Methods**

### **Clinical measurements**

At the study sites, trained nurses measured the workers' anthropometric characteristics and applied current guidelines to measure office blood pressure at the brachial artery. After the workers had rested for 5 minutes in the sitting position, the nurses obtained five consecutive blood pressure readings to the nearest 2 mm Hg by auscultation of the Korotkoff sounds, using standard mercury sphygmomanometers. For analysis, the five readings were averaged. Mean arterial pressure was diastolic blood pressure plus one third of pulse pressure (the difference between systolic and diastolic blood pressure). Blood pressure was categorised according to the 2017 ACC/AHA guideline.<sup>1</sup> If systolic and diastolic blood pressure were in different categories, the highest value was used to classify participants. Body mass index was body weight in kilograms divided by height in meters squared. The study nurses administered the validated<sup>2</sup> questionnaire at baseline and follow-up, to collect information about each worker's medical history, exposure to heavy metals, smoking and drinking habits, intake of medications and life style. Diabetes mellitus was a self-reported diagnosis, a fasting blood glucose of 126 mg/dl (7.0 mmol/l) or higher, or use of antidiabetic drugs.

### **Biochemical measurements**

Venous blood samples were obtained after 8 to 12 hours of fasting. BL was determined on whole blood by inductively coupled plasma mass spectrometry at an analytical laboratory certified for BL analysis in compliance with the provisions of the OSHA Lead Standard, 29CFR 1910.1025 (Occupational Safety and Health Administration [[www.osha.gov](http://www.osha.gov)]). Prior to analysis, the specimens were digested with nitric acid and spiked with an iridium internal standard. The BL detection limit was 0.5 µg/dl. The accuracy of the BL tests was verified by

use of proficiency samples purchased from the College of American Pathologists (CAP) and the Pennsylvania Department of Blood Lead Programs.<sup>3</sup> Proficiency testing was performed in six separate trial runs, including in total 30 test samples annually. All survey materials were handled in the same manner as the study samples and processed with the normal workflow utilising the same repeat/dilution protocols and calibration and quality control frequency.<sup>3</sup> Compliance with Clinical Laboratory Improvement Amendments (CLIA), CAP and New York State accreditation and regulatory requirements was verified routinely with test level review of the laboratory services by external auditors. Calibrators with certified accuracy (National Institute of Standards and Technology [<https://www.nist.gov>]) were included in each batch of study samples and spanned the range of the analytical measurement range. Accuracy was evaluated on Westgard Rules<sup>4</sup> and defined within the total allowable error established with review of the CAP, Centers for Disease Control and Prevention, CLIA 88,<sup>5</sup> and OSHA guidelines. Accuracy, defined as the deviation from known BL standards ran along with the study samples, was within 10%. The bias determined according to the Bland and Altman approach<sup>6</sup> in 30 split blood samples with BL concentrations (average in duplicate samples) ranging from 0.70 to 27.9 µg/dl, was 0.08 µg/dl (95% confidence interval [CI], -0.01 to 0.18,  $P = 0.07$ ).<sup>7</sup> The repeatability coefficient, defined as twice the standard deviation (SD) of the signed differences between duplicate measurements,<sup>6</sup> was 0.52. Expressed as a percentage of mean BL or as a percentage of near maximal BL variation (four times the SD of the logarithmically transformed distribution), the repeatability coefficient was 6.7% and 1.9%, respectively. Lower values indicate better repeatability.

Total and high-density (HDL) lipoprotein serum cholesterol, serum creatinine, serum cystatin C,  $\gamma$ -glutamyltransferase (an index of alcohol intake), blood urea nitrogen, and blood glucose were measured by automated enzymatic methods, serum insulin by ELISA, and

serum sodium by flame photometry. Serum creatinine was measured, using Jaffe's method with modifications in a single certified laboratory that applied isotope-dilution mass spectrometry for calibration.<sup>8</sup> eGFR was derived from serum creatinine, serum cystatin C and both, using the Chronic Kidney Disease Epidemiology Collaboration equations (Table S1).<sup>9</sup> CKD stages were categorised according to the National Kidney Foundation Kidney Disease Outcomes Quality Initiative guideline.<sup>10</sup> Serum osmolality (mOsm/kg) was computed as  $2 \times (\text{serum Na}^+ [\text{mmol/L}]) + (\text{blood glucose} [\text{mg/dl}] / 18) + (\text{blood urea nitrogen} [\text{mg/dl}] / 2.8)$ .<sup>11</sup> Fresh urine samples were analysed for specific gravity and the albumin-to-creatinine ratio (ACR) defined as the urinary albumin in milligrams divided by urine creatinine in grams. Over three evaluations, the laboratory obtained a proficiency score of 100% for the BL measurements and 100% for routine biochemistry.

### **Haematological measurements**

Haemoglobin and the red blood cell (RBC) count were measured, using the fully automated UniCel DxH800 haematology analyser (Beckman Coulter, Brea, CA, USA). In the RBC chamber of the instrument, RBCs are counted and discriminated by electrical impedance as the cells are pulled through each of three sensing apertures (50  $\mu\text{m}$  in diameter and 60  $\mu\text{m}$  in length). Electrical pulses generated in the counting cycles are sent to the analyser for editing, coincidence correction, and digital conversion. Two of the three RBC counts obtained must match within specified limits for the counts to be accepted by the instrument. This multiple counting procedure prevents data errors resulting from aperture obstructions or statistical outliers and allows for excellent reproducibility. The haematocrit, mean corpuscular volume (MCV), mean cell haemoglobin (MCH), and mean cell haemoglobin concentration (MCHC) are calculated from measured and derived values. MCV is obtained by multiplying a volume of blood by the proportion of blood that is cellular (the haematocrit),

and dividing that product by the number of RBCs. MCH is average quantity of haemoglobin in a single RBC. MCHC is the average amount of haemoglobin per RBC, relative to the size of the cell. The RBC distribution width is derived directly from the histogram as the coefficient of variation of the RBC volume distribution.

## References

1. Whelton PK, Carey RM, Aronow WS, et al. 2017 ACC/AHA/AAPA/ABC/ACPM/AGS/APhA/ASH/ASPC/NMA/PCNA guideline for prevention, detection, evaluation, and management of high blood pressure in adults: A report of the American College of Cardiology/American Heart Association Task Force on Clinical Practice Guidelines. *J Am Coll Cardiol.* 2018;71:e127-e248.
2. Staessen JA, Lauwerys RR, Buchet JP, et al. Impairment of renal function with increasing blood lead concentrations in the general population. *N Engl J Med.* 1992;327:151-156.
3. Centers for Disease Control and Prevention. Screening young children for lead poisoning: Guidance for state and local public health officials; Appendix C1: The Lead Laboratory (accessed 18 September 2021). 2018.
4. Westgard JO, Barry PL, Hunt MR, et al. A multi-rule Shewhart chart for quality control in clinical chemistry. *Clin Chem.* 1981;27:493-501.
5. Centers for Disease Control and Prevention. CLIA '88 Focus on Clinic and Office Laboratories (accessed 18 September 2021). 1988.
6. Bland JM, Altman DG. Statistical methods for assessing agreement between two methods of clinical measurement. *Lancet.* 1986;1:307-310.

7. Yu CG, Wei FF, Yang WY, et al. Heart rate variability and peripheral nerve conduction velocity in relation to blood lead in newly hired lead workers. *Occup Environ Med.* 2019;76:382-388.
8. Myers GL, Miller WG, Coresh J, et al. Recommendations for improving serum creatinine measurement: a report from the laboratory working group of the National Kidney Disease Education Program. *Clin Chem.* 2006;52:5-18.
9. Inker LA, Schmid CH, Tighiouart H, et al. Estimating glomerular filtration rate from serum creatinine and cystatin C. *N Engl J Med.* 2012;367:20-29.
10. Levey AS, Eckardt KU, Dorman NM, et al. Nomenclature for kidney function and disease — executive summary and glossary from a Kidney Disease: Improving Global Outcomes (KDIGO) consensus conference. *Eur Heart J.* 2020;41:4592-4598.
11. Rasouli M. Basic concepts and practical equations on osmolality: biochemical approach. *Clin Biochem.* 2016;49:936-941.

**Table S1 | Chronic Kidney Disease Epidemiology Collaboration equations for estimating glomerular filtration rates derived from serum creatinine, serum cystatin C and both**

| Variable            | Sex            | Serum creatinine (mg/dl) | Serum cystatin C (mg/l) | Equation for estimating GFR                                                                                                      |
|---------------------|----------------|--------------------------|-------------------------|----------------------------------------------------------------------------------------------------------------------------------|
| eGFR <sub>crt</sub> | Female         | ≤ 0.7                    |                         | $144 \times (\text{Scr} / 0.7)^{-0.329} \times 0.993^{\text{Age}}$ [ $\times 1.159$ if black]                                    |
|                     |                | > 0.7                    |                         | $144 \times (\text{Scr} / 0.7)^{-1.209} \times 0.993^{\text{Age}}$ [ $\times 1.159$ if black]                                    |
|                     | Male           | ≤ 0.9                    |                         | $144 \times (\text{Scr} / 0.7)^{-0.411} \times 0.993^{\text{Age}}$ [ $\times 1.159$ if black]                                    |
|                     |                | > 0.9                    |                         | $144 \times (\text{Scr} / 0.7)^{-1.209} \times 0.993^{\text{Age}}$ [ $\times 1.159$ if black]                                    |
| eGFR <sub>cys</sub> | Female or male |                          | ≤ 0.8                   | $133 \times (\text{Scys} / 0.8)^{-0.499} \times 0.996^{\text{Age}}$ [ $\times 0.932$ if female]                                  |
|                     |                |                          | > 0.8                   | $133 \times (\text{Scys} / 0.8)^{-1.328} \times 0.996^{\text{Age}}$ [ $\times 0.932$ if female]                                  |
| eGFR <sub>cc</sub>  | Female         | ≤ 0.7                    | ≤ 0.8                   | $130 \times (\text{Scr} / 0.7)^{-0.248} \times (\text{Scys} / 0.8)^{-0.375} \times 0.995^{\text{Age}}$ [ $\times 1.08$ if black] |
|                     |                |                          | > 0.8                   | $130 \times (\text{Scr} / 0.7)^{-0.248} \times (\text{Scys} / 0.8)^{-0.711} \times 0.995^{\text{Age}}$ [ $\times 1.08$ if black] |
|                     |                | > 0.7                    | ≤ 0.8                   | $130 \times (\text{Scr} / 0.7)^{-0.601} \times (\text{Scys} / 0.8)^{-0.375} \times 0.995^{\text{Age}}$ [ $\times 1.08$ if black] |
|                     |                |                          | > 0.8                   | $130 \times (\text{Scr} / 0.7)^{-0.601} \times (\text{Scys} / 0.8)^{-0.711} \times 0.995^{\text{Age}}$ [ $\times 1.08$ if black] |
|                     | Male           | ≤ 0.9                    | ≤ 0.8                   | $135 \times (\text{Scr} / 0.7)^{-0.207} \times (\text{Scys} / 0.8)^{-0.375} \times 0.995^{\text{Age}}$ [ $\times 1.08$ if black] |
|                     |                |                          | > 0.8                   | $135 \times (\text{Scr} / 0.7)^{-0.207} \times (\text{Scys} / 0.8)^{-0.711} \times 0.995^{\text{Age}}$ [ $\times 1.08$ if black] |
|                     |                | > 0.9                    | ≤ 0.8                   | $135 \times (\text{Scr} / 0.7)^{-0.601} \times (\text{Scys} / 0.8)^{-0.375} \times 0.995^{\text{Age}}$ [ $\times 1.08$ if black] |
|                     |                |                          | > 0.8                   | $135 \times (\text{Scr} / 0.7)^{-0.601} \times (\text{Scys} / 0.8)^{-0.711} \times 0.995^{\text{Age}}$ [ $\times 1.08$ if black] |

eGFR<sub>crt</sub>, eGFR<sub>cys</sub>, and eGFR<sub>cc</sub> refer to the glomerular filtration rate estimated from serum creatinine, serum cystatin C or both. To convert serum creatinine to  $\mu\text{mol/l}$ , multiply by 88.42; to convert cystatin C from mg/l to nmol/l, multiply by 74.9. This table is reproduced from *N Engl J Med*. 2012;367:20-29 (reference 9).



**Table S2 | Baseline characteristics of workers followed up and not followed up**

| Characteristic              | N (%)      |              | Characteristic                     | Mean (SD/IQR)     |                   |
|-----------------------------|------------|--------------|------------------------------------|-------------------|-------------------|
|                             | Analysed   | Not analysed |                                    | Analysed          | Not analysed      |
| Male                        | 230 (91.6) | 218 (85.5)   | Age, years                         | 29.7 (9.8)        | 27.8 (10.0)       |
| White ethnicity             | 122 (48.6) | 110 (43.1)   | Body mass index, kg/m <sup>2</sup> | 28.9 (6.1)        | 29.0 (6.8)        |
| Hispanic ethnicity          | 107 (42.6) | 122 (47.8)   | Systolic blood pressure, mm Hg     | 120.0 (10.2)      | 120.3 (10.5)      |
| Black ethnicity             | 12 (4.8)   | 10 (4.0)     | Diastolic blood pressure, mm Hg    | 79.7 (8.8)        | 81.1 (8.4)        |
| Other ethnicity             | 10 (4.0)   | 13 (5.1)     | Mean arterial pressure, mm Hg      | 93.1 (8.7)        | 94.2 (8.3)        |
| Current smokers             | 67 (27.0)  | 75 (29.4)    | Total cholesterol, mg/dl           | 171.8 (37.8)      | 170.6 (37.9)      |
| Alcohol intake              | 110 (44.4) | 100 (39.2)   | HDL cholesterol, mg/dl             | 46.3 (12.0)       | 47.7 (12.3)       |
| Hypertension stage $\geq 1$ | 125 (49.8) | 161 (63.1)*  | Total-to-HDL cholesterol ratio     | 3.91 (1.3)        | 3.82 (1.3)        |
| Hypertension stage $\geq 2$ | 46 (18.3)  | 35 (13.7)    | Blood glucose, mg/dl               | 94.3 (15.8)       | 92.7 (11.5)       |
| Treated hypertension        | 17 (6.8)   | 8 (3.1)      | $\gamma$ -glutamyltransferase, U/l | 22.6 (16.0, 33.0) | 21.8 (15.0, 30.0) |
| Diabetes mellitus           | 12 (4.8)   | 2 (0.78)*    | Blood lead, $\mu$ g/dL             | 4.13 (2.40, 7.80) | 4.04 (2.20, 8.40) |

Values are number of participants (%), arithmetic mean (SD) or geometric mean (IQR). Blood pressure was the average of five readings. Hypertension was categorised according to the 2017 ACC/AHA guideline, irrespective of treatment status. Mean arterial pressure was diastolic blood pressure plus one third of pulse pressure. Diabetes mellitus was a self-reported diagnosis, a fasting blood glucose of  $\geq 7$  mmol/l, or use of antidiabetic drugs. To convert total or high-density lipoprotein (HDL) serum cholesterol to mmol/l, multiply by 0.0259; to convert blood glucose to mmol/l, multiply by 0.0559. An asterisk indicates a significant between-group difference.

**Table S3 | Red blood cell biomarkers changes from baseline to last follow-up by quartiles of the distribution of the follow-up-to-baseline blood lead concentration ratio**

| Characteristic                 | <1.91                | 1.91-3.45            | 3.45-5.66            | ≥5.66                | P value |
|--------------------------------|----------------------|----------------------|----------------------|----------------------|---------|
| Number in group                | 62                   | 63                   | 63                   | 63                   | ...     |
| Haemoglobin, g/dl              | -0.19 (-0.39, 0.00)  | -0.06 (-0.26, 0.14)  | -0.07 (-0.26, 0.11 ) | -0.23 (-0.41, -0.05) | 0.77    |
| Haematocrit, %                 | -0.01 (-0.02, -0.00) | -0.01 (-0.01, -0.00) | -0.01 (-0.01, -0.00) | -0.01 (-0.02, -0.00) | 0.88    |
| RBC count, $\times 10^{12}$ /l | -0.14 (-0.21, -0.07) | -0.15 (-0.20, -0.09) | -0.10 (-0.17, -0.03) | -0.15 (-0.21, -0.09) | 0.97    |
| RDW, %                         | 15.8 (15.1, 16.4)    | 15.5 (14.6, 16.4)    | 15.6 (14.9, 16.3)    | 16.2 (15.8, 16.7)    | 0.33    |
| MCV, fl                        | 0.47 (-0.19, 1.14)   | 0.90 (0.19, 1.61)    | 0.41 (0.00, 0.82 )   | 0.64 (-0.03, 1.31)   | >0.99   |
| MCH, pg                        | 0.66 (0.13, 1.19)    | 0.85 (0.34, 1.35)    | 0.69 (0.31, 1.07 )   | 0.37 (0.05, 0.70)    | 0.31    |
| MCHC, g/dl                     | 0.33 (0.12, 0.54)    | 0.45 (0.29, 0.62)    | 0.37 (0.15, 0.58 )   | 0.23 (-0.04, 0.50)   | 0.43    |

RBC, RDW, MCV, MCH, MCHC indicate red blood cell, red cell distribution width, mean corpuscular volume, mean corpuscular haemoglobin and mean corpuscular haemoglobin concentration, respectively. Within-group changes are arithmetic mean (SD) or geometric mean (IQR). P values denote the significance of the between-group differences.

**Table S4 | Renal function at baseline by quartiles of the distribution of the follow-up-to-baseline blood lead ratio**

| Characteristic                                   | <1.91             | 1.91-3.45         | 3.45-5.66         | ≥5.66             | P value |
|--------------------------------------------------|-------------------|-------------------|-------------------|-------------------|---------|
| Number in group                                  | 62                | 63                | 63                | 63                | ...     |
| Serum creatinine, mg/dl                          | 0.932 (0.173)     | 0.955 (0.157)     | 0.988 (0.186)     | 0.955 (0.152)     | 0.28    |
| Serum cystatin C, mg/l                           | 0.671 (0.114)     | 0.680 (0.103)     | 0.678 (0.104)     | 0.675 (0.107)     | 0.86    |
| eGFR <sub>crt</sub> , ml/min/1.73 m <sup>2</sup> | 106.2 (18.1)      | 106.4 (17.5)      | 102.9 (16.2)      | 106.1 (16.2)      | 0.69    |
| eGFR <sub>cys</sub> , ml/min/1.73 m <sup>2</sup> | 124.6 (15.1)      | 125.1 (12.5)      | 125.5 (12.3)      | 125.2 (13.4)      | 0.77    |
| eGFR <sub>cc</sub> , ml/min/1.73 m <sup>2</sup>  | 115.5 (16.7)      | 115.0 (13.9)      | 113.2 (12.6)      | 115.2 (14.2)      | 0.75    |
| Serum osmolality, mOsm/kg                        | 287.1 (3.4)       | 286.3 (4.0)       | 287.0 (4.1)       | 286.7 (3.6)       | 0.77    |
| Serum sodium, mmol/l                             | 138.4 (1.7)       | 138.1 (1.8)       | 138.4 (1.9)       | 138.2 (1.7)       | 0.83    |
| Blood glucose, mg/dl                             | 95.1 (14.4)       | 92.3 (10.5)       | 94.9 (22.5)       | 94.7 (13.5)       | 0.85    |
| Serum insulin, U/l                               | 6.94 (4.00, 12.9) | 7.87 (3.60, 14.6) | 6.84 (3.60, 11.0) | 7.25 (3.50, 13.2) | 0.99    |
| Blood urea nitrogen, mg/dl                       | 14.1 (3.9)        | 14.0 (3.8)        | 14.0 (3.3)        | 13.9 (3.1)        | 0.70    |
| BUN-to-SCRT ratio                                | 15.5 (4.6)        | 14.8 (3.9)        | 14.3 (3.5)        | 15.0 (4.5)        | 0.38    |
| Urine specific gravity,                          | 1.017 (0.0080)    | 1.020 (0.0075)    | 1.021 (0.0079)    | 1.019 (0.0073)    | 0.15    |
| ACR, mg/g                                        | 4.54 (2.92, 6.70) | 4.42 (3.12, 6.18) | 4.37 (2.65, 6.55) | 4.63 (2.93, 5.93) | 0.90    |

eGFR<sub>crt</sub>, eGFR<sub>cys</sub>, and eGFR<sub>cc</sub> refer to the glomerular filtration rate estimated from serum creatinine, serum cystatin C or both. BUN-to-SCRT ratio is the ratio of blood urea nitrogen (mg/dl) to serum creatinine (mg/dl). Values are arithmetic mean (SD) or geometric mean (IQR). P values are for trend across increasing categories of the follow-up-to-baseline blood lead concentration ratio. To convert serum creatinine to μmol/l, multiply by 88.42; to convert cystatin C from mg/l to nmol/l, multiply by 74.9; to convert blood glucose to mmol/l, multiply by 0.0559; to convert blood urea nitrogen to mmol/l, multiply by 0.3571.

**Table S5 | Renal function at last follow-up by quartiles of the distribution of the follow-up-to-baseline blood lead ratio**

| Characteristic                                   | <1.91             | 1.91-3.45         | 3.45-5.66         | ≥5.66             | P value |
|--------------------------------------------------|-------------------|-------------------|-------------------|-------------------|---------|
| Number in group                                  | 62                | 63                | 63                | 63                | ...     |
| Serum creatinine, mg/dl                          | 0.994 (0.210)     | 1.038 (0.157)     | 1.022 (0.178)     | 1.019 (0.156)     | 0.56    |
| Serum cystatin C, mg/l                           | 0.693 (0.164)     | 0.704 (0.148)     | 0.722 (0.165)     | 0.720 (0.143)     | 0.26    |
| eGFR <sub>crt</sub> , ml/min/1.73 m <sup>2</sup> | 98.9 (19.1)       | 97.0 (15.9)       | 98.0 (16.3)       | 98.4 (16.0)       | 0.97    |
| eGFR <sub>cys</sub> , ml/min/1.73 m <sup>2</sup> | 121.5 (20.2)      | 121.4 (18.1)      | 120.3 (20.2)      | 119.2 (18.8)      | 0.46    |
| eGFR <sub>cc</sub> , ml/min/1.73 m <sup>2</sup>  | 109.6 (17.9)      | 108.1 (14.9)      | 107.7 (14.8)      | 107.7 (16.1)      | 0.49    |
| Serum osmolality, mOsm/kg                        | 289.5 (5.9)       | 288.8 (4.5)       | 289.0 (3.9)       | 289.1 (3.4)       | 0.76    |
| Serum sodium, mmol/l                             | 139.5 (2.8)       | 139.0 (2.0)       | 139.3 (1.9)       | 139.4 (1.7)       | 0.98    |
| Blood glucose, mg/dl                             | 90.3 (19.4)       | 87.3 (16.3)       | 86.5 (16.9)       | 89.3 (21.2)       | 0.71    |
| Insulin U/l                                      | 9.50 (5.20, 20.7) | 8.57 (3.90, 19.2) | 8.16 (4.30, 14.7) | 9.28 (4.00, 17.2) | 0.84    |
| Blood urea nitrogen, mg/dl                       | 15.2 (3.3)        | 16.4 (4.7)        | 15.4 (3.0)        | 15.1 (3.7)        | 0.52    |
| BUN-to-SCRT ratio                                | 15.8 (4.0)        | 15.7 (3.8)        | 15.3 (3.0)        | 15.1 (3.8)        | 0.21    |
| Urinary specific gravity,                        | 1.022 (0.0068)    | 1.023 (0.0077)    | 1.021 (0.0070)    | 1.022 (0.0067)    | 0.89    |
| ACR, mg/g                                        | 4.45 (2.82, 7.77) | 4.51 (2.63, 6.25) | 4.83 (2.89, 7.19) | 4.65 (2.86, 6.17) | 0.68    |

eGFR<sub>crt</sub>, eGFR<sub>cys</sub>, and eGFR<sub>cc</sub> refer to the glomerular filtration rate estimated from serum creatinine, serum cystatin C or both. BUN-to-SCRT ratio is the ratio of blood urea nitrogen (mg/dl) to serum creatinine (mg/dl). Values are arithmetic mean (SD) or geometric mean (IQR). P values are for trend across increasing categories of the follow-up-to-baseline blood lead concentration ratio. To convert serum creatinine to μmol/l, multiply by 88.42; to convert cystatin C from mg/l to nmol/l, multiply by 74.9; to convert blood glucose to mmol/l, multiply by 0.0559; to convert blood urea nitrogen to mmol/l, multiply by 0.3571.

**Table S6 | Association between changes in red blood cell biomarkers and in blood lead**

| Variable                       | Unadjusted          |                | Adjusted            |                | Fully adjusted      |                |
|--------------------------------|---------------------|----------------|---------------------|----------------|---------------------|----------------|
|                                | $\beta$ (95% CI)    | <i>P</i> value | $\beta$ (95% CI)    | <i>P</i> value | $\beta$ (95% CI)    | <i>P</i> value |
| Haemoglobin, g/dl              | 0.00 (-0.03, 0.03)  | 0.87           | 0.01 (-0.02, 0.04)  | 0.63           | 0.01 (-0.02, 0.04)  | 0.65           |
| Haematocrit, %                 | 0.01 (-0.08, 0.10)  | 0.90           | 0.03 (-0.06, 0.12)  | 0.56           | 0.03 (-0.07, 0.12)  | 0.57           |
| RBC count, $\times 10^{12}$ /l | -0.00 (-0.01, 0.00) | 0.70           | -0.00 (-0.01, 0.01) | 0.95           | -0.00 (-0.01, 0.01) | 0.84           |
| RDW, %                         | -0.63 (-5.13, 3.86) | 0.78           | 0.04 (-0.23, 0.31)  | 0.77           | 0.09 (-0.19, 0.37)  | 0.52           |
| MCV, fl                        | 0.00 (-0.13, 0.14)  | 0.97           | 0.03 (-0.10, 0.17)  | 0.64           | 0.02 (-0.12, 0.16)  | 0.78           |
| MCH, pg                        | 0.00 (-0.01, 0.02)  | 0.99           | 0.00 (-0.01, 0.02)  | 0.83           | 0.00 (-0.01, 0.02)  | 0.78           |
| MCHC, g/dl                     | 0.01 (-0.00, 0.02)  | 0.28           | 0.01 (-0.01, 0.02)  | 0.34           | 0.00 (-0.01, 0.02)  | 0.36           |

RBC, RDW, MCV, MCH, MCHC indicate red blood cell, red cell distribution width, mean corpuscular volume, mean corpuscular haemoglobin and mean corpuscular haemoglobin concentration, respectively. Association sizes ( $\beta$ ), given with 95% confidence interval, express the change in the dependent variable for a 3-fold increase in the blood lead concentration. Adjusted models accounted for sex, age, follow-up duration, the time of day of blood sampling (nighttime *vs* daytime), and the baseline red blood cell biomarker being analysed. Fully adjusted models additionally accounted for baseline body mass index, change in body weight, and the baseline values of and changes during follow-up in smoking status, mean arterial pressure, antihypertensive medication (yes *vs* no), the total-to-HDL cholesterol ratio and  $\gamma$ -glutamyltransferase.

**Table S7 | Association between changes in renal function and in blood lead in 223 workers not on antihypertensive drug treatment**

| Variable                                         | Unadjusted          |         | Adjusted            |         | Fully adjusted      |         |
|--------------------------------------------------|---------------------|---------|---------------------|---------|---------------------|---------|
|                                                  | $\beta$ (95% CI)    | P value | $\beta$ (95% CI)    | P value | $\beta$ (95% CI)    | P value |
| Serum creatinine, $\times 10^{-2}$ mg/dl         | -0.07 (-1.82, 1.69) | 0.94    | 0.44 (-1.12, 2.00)  | 0.58    | 0.55 (-1.05, 2.16)  | 0.50    |
| Serum cystatin C, $\times 10^{-2}$ mg/l          | 0.63 (-0.97, 2.22)  | 0.44    | 1.11 (-0.41, 2.64)  | 0.15    | 1.17 (-0.41, 2.76)  | 0.15    |
| eGFR <sub>crt</sub> , ml/min/1.73 m <sup>2</sup> | -0.11 (-1.88, 1.66) | 0.90    | -0.64 (-2.20, 0.92) | 0.42    | -0.82 (-2.43, 0.80) | 0.32    |
| eGFR <sub>cys</sub> , ml/min/1.73 m <sup>2</sup> | -0.82 (-2.71, 1.06) | 0.39    | -1.43 (-3.24, 0.38) | 0.12    | -1.51 (-3.39, 0.36) | 0.11    |
| eGFR <sub>cc</sub> , ml/min/1.73 m <sup>2</sup>  | -0.50 (-2.06, 1.06) | 0.53    | -1.14 (-2.53, 0.25) | 0.11    | -1.31 (-2.75, 0.13) | 0.074   |
| Serum osmolality, mOsm/kg                        | -0.10 (-0.79, 0.58) | 0.77    | -0.21 (-0.71, 0.30) | 0.42    | -0.21 (-0.73, 0.32) | 0.43    |
| Serum sodium, mmol/l                             | 0.06 (-0.28, 0.40)  | 0.73    | 0.02 (-0.24, 0.29)  | 0.86    | 0.03 (-0.24, 0.29)  | 0.85    |
| Blood glucose, mg/dl                             | -1.87 (-4.36, 0.63) | 0.14    | -1.18 (-3.11, 0.75) | 0.23    | -1.64 (-3.61, 0.32) | 0.10    |
| Insulin, %                                       | -4.05 (-15.7, 9.27) | 0.53    | -5.72 (-16.3, 6.17) | 0.33    | -8.18 (-17.7, 2.49) | 0.13    |
| Blood urea nitrogen, mg/dl                       | -0.30 (-0.84, 0.24) | 0.28    | -0.32 (-0.78, 0.14) | 0.17    | -0.24 (-0.70, 0.22) | 0.30    |
| BUN-to-SCRT ratio                                | -0.20 (-0.73, 0.32) | 0.45    | -0.44 (-0.90, 0.02) | 0.063   | -0.39 (-0.86, 0.08) | 0.10    |
| Urinary specific gravity, $\times 10^{-2}$       | -0.03 (-0.15, 0.09) | 0.62    | -0.05 (-0.14, 0.04) | 0.25    | -0.04 (-0.13, 0.05) | 0.36    |
| ACR, %                                           | 1.14 (-8.87, 12.3)  | 0.83    | -2.06 (-9.88, 6.43) | 0.62    | -2.32 (-10.2, 6.27) | 0.58    |

eGFR<sub>crt</sub>, eGFR<sub>cys</sub>, and eGFR<sub>cc</sub> refer to the glomerular filtration rate estimated from serum creatinine, serum cystatin C or both (reference<sup>9</sup>). BUN-to-SCRT ratio is the ratio of blood urea nitrogen (mg/dl) to serum creatinine (mg/dl). Changes in serum insulin and the urinary albumin-to-creatinine ratio are expressed as percentage differences from baseline to follow-up. Association sizes ( $\beta$ ), given with 95% confidence interval, express the change in the dependent variable for a 3-fold increase in the blood lead concentration. Adjusted models accounted for sex, age, the change of age from baseline to follow-up (equivalent to between-visit interval), the time of day of blood sampling (nighttime vs daytime), and the baseline renal function measure being analysed. Fully adjusted models additionally accounted for baseline body mass index, change in body weight, and the baseline values of and changes during follow-up in smoking status, mean arterial pressure, antihypertensive medication (yes vs no), the total-to-HDL cholesterol ratio and  $\gamma$ -glutamyltransferase.

**Table S8 | Associations between renal function and blood lead at baseline and at last follow-up**

| Variable                                         | Baseline            |                | Last follow-up       |                | <i>Pslope</i> |
|--------------------------------------------------|---------------------|----------------|----------------------|----------------|---------------|
|                                                  | $\beta$ (95% CI)    | <i>P</i> value | $\beta$ (95% CI)     | <i>P</i> value |               |
| Serum creatinine, $\times 10^{-2}$ mg/dl         | -1.15 (-3.80, 1.49) | 0.39           | 0.38 (-2.81, 3.58)   | 0.81           | 0.47          |
| Serum cystatin C, $\times 10^{-2}$ mg/l          | 0.26 (-1.43, 1.95)  | 0.76           | 2.96 (-0.06, 5.97)   | 0.056          | 0.13          |
| eGFR <sub>crt</sub> , ml/min/1.73 m <sup>2</sup> | 1.31 (-1.23, 3.85)  | 0.31           | -0.80 (-3.78, 2.18)  | 0.60           | 0.29          |
| eGFR <sub>cys</sub> , ml/min/1.73 m <sup>2</sup> | -0.19 (-2.03, 1.65) | 0.84           | -3.36 (-6.65, -0.07) | 0.047          | 0.099         |
| eGFR <sub>cc</sub> , ml/min/1.73 m <sup>2</sup>  | 0.63 (-1.43, 2.69)  | 0.55           | -2.33 (-4.94, 0.29)  | 0.083          | 0.082         |
| Serum osmolality, mOsm/kg                        | -0.42 (-1.06, 0.23) | 0.21           | 0.23 (-0.69, 1.14)   | 0.62           | 0.26          |
| Serum sodium, mmol/l                             | -0.23 (-0.53, 0.07) | 0.14           | 0.21 (-0.22, 0.64)   | 0.35           | 0.10          |
| Blood glucose, mg/dl                             | -0.44 (-3.10, 2.21) | 0.74           | -2.78 (-6.36, 0.79)  | 0.13           | 0.30          |
| Insulin, %                                       | 3.25 (-2.64, 9.51)  | 0.29           | -5.62 (-12.8, 2.17)  | 0.15           | 0.074         |
| Blood urea nitrogen, mg/dl                       | 0.19 (-0.40, 0.78)  | 0.53           | -0.09 (-0.82, 0.64)  | 0.80           | 0.56          |
| BUN-to-SCRT ratio                                | 0.00 (-0.00, 0.01)  | 0.21           | -0.00 (-0.01, 0.00)  | 0.50           | 0.18          |
| Urine specific gravity $\times 10^{-2}$          | -0.04 (-0.17, 0.09) | 0.57           | -0.01 (-0.14, 0.13)  | 0.89           | 0.77          |
| ACR, %                                           | -2.49 (-7.67, 2.97) | 0.37           | 0.08 (-6.86, 7.55)   | 0.98           | 0.57          |

eGFR<sub>crt</sub>, eGFR<sub>cys</sub>, and eGFR<sub>cc</sub> refer to the glomerular filtration rate estimated from serum creatinine, serum cystatin C or both (reference <sup>9</sup>). BUN-to-SCRT ratio is the ratio of blood urea nitrogen (mg/dl) to serum creatinine (mg/dl). Changes in serum insulin and the urinary albumin-to-creatinine ratio are expressed as percentage differences from baseline to follow-up. Association sizes ( $\beta$ ), given with 95% confidence interval, express the change in the dependent variable for a 3-fold increase in the blood lead concentration. All models were adjusted for sex, age, the time of day of blood sampling (nighttime vs daytime), body mass index, smoking status, mean arterial pressure, antihypertensive medication (yes vs no), the total-to-HDL cholesterol ratio and  $\gamma$ -glutamyltransferase. *Pslope* derived by a z-statistic expresses the significance of the difference in the  $\beta$ s between baseline and last follow-up.

**Table S9 | Association between changes in renal function and in blood lead stratified by the median baseline age**

| Variable                                         | Baseline age <26.6 years<br>(N = 127) |                | Baseline age ≥26.6 years<br>(N = 124) |                | <i>Pint</i> |
|--------------------------------------------------|---------------------------------------|----------------|---------------------------------------|----------------|-------------|
|                                                  | $\beta$ (95% CI)                      | <i>P</i> value | $\beta$ (95% CI)                      | <i>P</i> value |             |
| Serum creatinine, $\times 10^{-2}$ mg/dL         | 0.22 (-2.21, 2.66)                    | 0.86           | 1.26 (-0.82, 3.34)                    | 0.23           | 0.45        |
| Serum cystatin C, $\times 10^{-2}$ mg/L          | 1.20 (-0.90, 3.29)                    | 0.26           | 1.41 (-0.98, 3.79)                    | 0.24           | 0.80        |
| eGFR <sub>crt</sub> , ml/min/1.73 m <sup>2</sup> | -0.32 (-2.75, 2.10)                   | 0.79           | -1.15 (-3.14, 0.84)                   | 0.25           | 0.49        |
| eGFR <sub>cys</sub> , ml/min/1.73 m <sup>2</sup> | -1.51 (-3.97, 0.95)                   | 0.23           | -1.90 (-4.66, 0.85)                   | 0.17           | 0.76        |
| eGFR <sub>cc</sub> , ml/min/1.73 m <sup>2</sup>  | -1.24 (-3.33, 0.84)                   | 0.24           | -1.43 (-3.33, 0.46)                   | 0.14           | 0.58        |
| Serum osmolality, mOsm/kg                        | 0.36 (-0.35, 1.06)                    | 0.32           | -0.49 (-1.40, 0.42)                   | 0.29           | 0.057       |
| Serum sodium, mmol/l                             | 0.39 (0.05, 0.73)                     | 0.026          | -0.32 (-0.77, 0.14)                   | 0.17           | 0.002       |
| Blood glucose, mg/dl                             | -1.91 (-4.56, 0.74)                   | 0.16           | 1.75 (-1.31, 4.80)                    | 0.26           | 0.043       |
| Serum insulin, %                                 | -5.37 (-19.1, 10.6)                   | 0.49           | -6.30 (-20.8, 10.9)                   | 0.45           | 0.66        |
| Blood urea nitrogen, mg/dl                       | -0.45 (-1.03, 0.13)                   | 0.12           | 0.04 (-0.64, 0.72)                    | 0.90           | 0.36        |
| BUN-to-SCRT ratio                                | -0.44 (-1.05, 0.16)                   | 0.15           | -0.34 (-1.03, 0.35)                   | 0.33           | 0.85        |
| Urine specific gravity, $\times 10^{-2}$         | -0.11 (-0.23, -0.00)                  | 0.045          | 0.11 (-0.03, 0.25)                    | 0.12           | 0.019       |
| ACR, %                                           | 1.33 (-8.88, 12.7)                    | 0.81           | -0.34 (-14.2, 15.7)                   | 0.96           | 0.64        |

eGFR<sub>crt</sub>, eGFR<sub>cys</sub>, and eGFR<sub>cc</sub> refer to the glomerular filtration rate estimated from serum creatinine, serum cystatin C or both (reference 9). BUN-to-SCRT ratio is the ratio of blood urea nitrogen (mg/dl) to serum creatinine (mg/dl). Changes in serum insulin and the urinary albumin-to-creatinine ratio are expressed as percentage differences from baseline to follow-up. Association sizes ( $\beta$ ), given with 95% confidence interval, express the change in the dependent variable for a 3-fold increase in the blood lead concentration. All models were adjusted for sex, age, follow-up duration, the time of day of blood sampling (nighttime vs daytime), the baseline renal function measure being analysed, and baseline body mass index, change in body weight, and the baseline values of and changes during follow-up in smoking status, mean arterial pressure, antihypertensive medication (yes vs no), total-to-HDL cholesterol ratio and  $\gamma$ -glutamyltransferase. *Pint* expresses the significance of the between-group interaction.



**Table S10 | Association between changes in renal function and in blood lead stratified by the median baseline blood lead**

| Variable                                         | Baseline blood lead <4.32 µg/dl<br>(N = 126) |                | Baseline blood lead ≥4.32 µg/dl<br>(N = 125) |                | <i>Pint</i> |
|--------------------------------------------------|----------------------------------------------|----------------|----------------------------------------------|----------------|-------------|
|                                                  | β (95% CI)                                   | <i>P</i> value | β (95% CI)                                   | <i>P</i> value |             |
| Serum creatinine, ×10 <sup>-2</sup> mg/dl        | 2.70 (0.38 , 5.01)                           | 0.023          | 1.47 (-1.79, 4.73)                           | 0.37           | 0.64        |
| Serum cystatin C, ×10 <sup>-2</sup> mg/l         | 1.25 (-1.49, 3.98)                           | 0.37           | 1.20 (-1.74, 4.14)                           | 0.42           | 0.79        |
| eGFR <sub>crt</sub> , ml/min/1.73 m <sup>2</sup> | -2.78 (-5.15, -0.41)                         | 0.022          | -1.49 (-4.51, 1.53)                          | 0.33           | 0.75        |
| eGFR <sub>cys</sub> , ml/min/1.73 m <sup>2</sup> | -1.52 (-4.69, 1.65)                          | 0.34           | -1.24 (-4.60, 2.12)                          | 0.47           | 0.73        |
| eGFR <sub>cc</sub> , ml/min/1.73 m <sup>2</sup>  | -2.33 (-4.33, -0.32)                         | 0.024          | -2.05 (-4.95, 0.85)                          | 0.16           | 0.93        |
| Serum osmolality, mOsm/kg                        | -0.00 (-0.73, 0.72)                          | >0.99          | 0.40 (-0.69, 1.49)                           | 0.47           | 0.91        |
| Serum sodium, mmol/l                             | -0.02 (-0.41, 0.37)                          | 0.91           | 0.23 (-0.26, 0.71)                           | 0.36           | 0.91        |
| Blood glucose, mg/dl                             | 0.56 (-2.60, 3.72)                           | 0.72           | -3.74 (-7.71, 0.23)                          | 0.065          | 0.96        |
| Insulin, %                                       | -3.83 (-18.5, 13.5)                          | 0.64           | -7.36 (-25.5, 15.2)                          | 0.49           | 0.47        |
| Blood urea nitrogen, mg/dl                       | 0.16 (-0.48, 0.81)                           | 0.62           | 0.39 (-0.46, 1.24)                           | 0.36           | 0.49        |
| BUN-to-SCRT ratio                                | -0.30 (-0.94, 0.35)                          | 0.36           | 0.01 (-0.90, 0.93)                           | 0.98           | 0.46        |
| Urine specific gravity, ×10 <sup>-2</sup>        | 0.02 (-0.11, 0.15)                           | 0.77           | 0.02 (-0.15, 0.19)                           | 0.79           | 0.94        |
| ACR, %                                           | -3.85 (-15.5, 9.41)                          | 0.55           | 9.49 (-8.20, 30.6)                           | 0.31           | 0.45        |

eGFR<sub>crt</sub>, eGFR<sub>cys</sub>, and eGFR<sub>cc</sub> refer to the glomerular filtration rate estimated from serum creatinine, serum cystatin C or both (reference 9). BUN-to-SCRT ratio is the ratio of blood urea nitrogen (mg/dl) to serum creatinine (mg/dl). Changes in serum insulin and the urinary albumin-to-creatinine ratio are expressed as percentage differences from baseline to follow-up. Association sizes (β), given with 95% confidence interval, express the change in the dependent variable for a 3-fold increase in the blood lead concentration. All models were adjusted for sex, age, follow-up duration, the time of day of blood sampling (nighttime vs daytime), the baseline renal function measure being analysed, and baseline body mass index, change in body weight, and the baseline values of and changes during follow-up in smoking status, mean arterial pressure, antihypertensive medication (yes vs no), total-to-HDL cholesterol ratio and γ-glutamyltransferase. *Pint* expresses the significance of the between-group interaction.

**Table S11 | Association between changes in renal function and in blood lead stratified by the median cumulative blood lead index**

| Variable                                         | CBLI < 34.6 µg/dl × year<br>(N = 123) |                | CBLI > 34.6 µg/dl × year<br>(N = 128) |                | <i>Pint</i> |
|--------------------------------------------------|---------------------------------------|----------------|---------------------------------------|----------------|-------------|
|                                                  | β (95% CI)                            | <i>P</i> value | β (95% CI)                            | <i>P</i> value |             |
| Serum creatinine, ×10 <sup>-2</sup> mg/dl        | 0.83 (-1.59, 3.24)                    | 0.50           | 1.89 (-0.42, 4.21)                    | 0.11           | 0.24        |
| Serum cystatin C, ×10 <sup>-2</sup> mg/l         | 0.59 (-1.61, 2.79)                    | 0.59           | 2.83 (0.53, 5.12)                     | 0.016          | 0.063       |
| eGFR <sub>crt</sub> , ml/min/1.73 m <sup>2</sup> | -0.72 (-3.23, 1.79)                   | 0.57           | -1.62 (-3.85, 0.61)                   | 0.15           | 0.39        |
| eGFR <sub>cys</sub> , ml/min/1.73 m <sup>2</sup> | -0.93 (-3.51, 1.65)                   | 0.48           | -3.46 (-6.10, -0.82)                  | 0.011          | 0.054       |
| eGFR <sub>cc</sub> , ml/min/1.73 m <sup>2</sup>  | -0.93 (-3.03, 1.17)                   | 0.38           | -2.66 (-4.62, -0.69)                  | 0.008          | 0.068       |
| Serum osmolality, mOsm/kg                        | 0.10 (-0.57, 0.77)                    | 0.77           | -0.04 (-0.90, 0.83)                   | 0.94           | 0.34        |
| Serum sodium, mmol/l                             | 0.21 (-0.16, 0.58)                    | 0.27           | -0.04 (-0.44, 0.37)                   | 0.86           | 0.12        |
| Blood glucose, mg/dl                             | -1.06 (-4.28, 2.16)                   | 0.52           | 0.14 (-3.32, 3.59)                    | 0.94           | 0.41        |
| Insulin, %                                       | -11.6 (-24.3, 3.34)                   | 0.12           | 4.45 (-11.8, 23.7)                    | 0.61           | 0.16        |
| Blood urea nitrogen, mg/dl                       | -0.22 (-0.85, 0.40)                   | 0.48           | 0.13 (-0.58, 0.83)                    | 0.72           | 0.42        |
| BUN-to-SCRT ratio                                | -0.26 (-0.88, 0.36)                   | 0.41           | -0.36 (-1.08, 0.35)                   | 0.31           | 0.95        |
| Urine specific gravity, ×10 <sup>-2</sup>        | -0.07 (-0.19, 0.04)                   | 0.21           | 0.02 (-0.11, 0.15)                    | 0.79           | 0.58        |
| ACR, %                                           | 2.99 (-8.37, 15.7)                    | 0.62           | 1.95 (-12.4, 18.7)                    | 0.80           | 0.59        |

CBLI is the cumulative blood lead index. eGFR<sub>crt</sub>, eGFR<sub>cys</sub>, and eGFR<sub>cc</sub> refer to the glomerular filtration rate estimated from serum creatinine, serum cystatin C or both (reference 9). BUN-to-SCRT ratio is the ratio of blood urea nitrogen (mg/dl) to serum creatinine (mg/dl). Changes in serum insulin and the urinary albumin-to-creatinine ratio are expressed as percentage differences from baseline to follow-up. Association sizes (β), given with 95% confidence interval, express the change in the dependent variable for a 3-fold increase in the blood lead concentration. All models were adjusted for sex, age, follow-up duration, the time of day of blood sampling (nighttime vs daytime), the baseline renal function measure being analysed, and baseline body mass index, change in body weight, and the baseline values of and changes during follow-up in smoking status, mean arterial pressure, antihypertensive medication (yes vs no), the total-to-HDL cholesterol ratio and γ-glutamyltransferase. *Pint* expresses the significance of the between-group interaction.

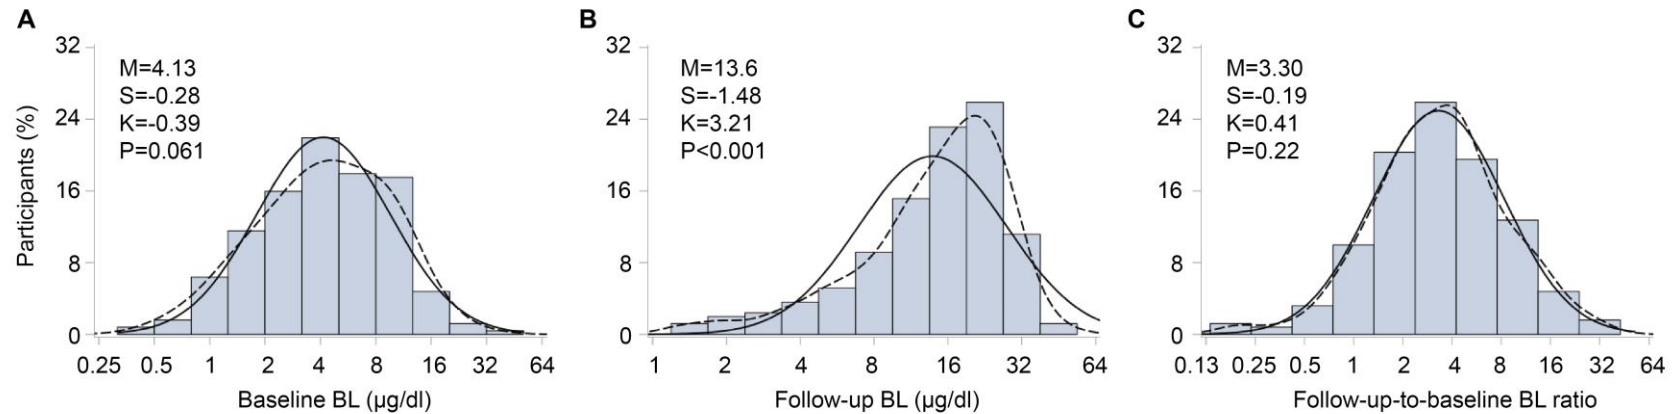**Figure S1**

**Distributions of blood lead at baseline (A) and last follow-up (B) and of the last-follow-up-to-baseline blood lead ratio (C).** The solid and dotted lines represent the normal and kernel density distributions.  $P$  values are for departure of the actually observed distribution from normality according to the Shapiro-Wilk statistic.  $M$  indicates the geometric mean. Skewness ( $S$ ) and kurtosis ( $K$ ) were computed as the third and fourth moments about the mean divided by the cube of the standard deviation.

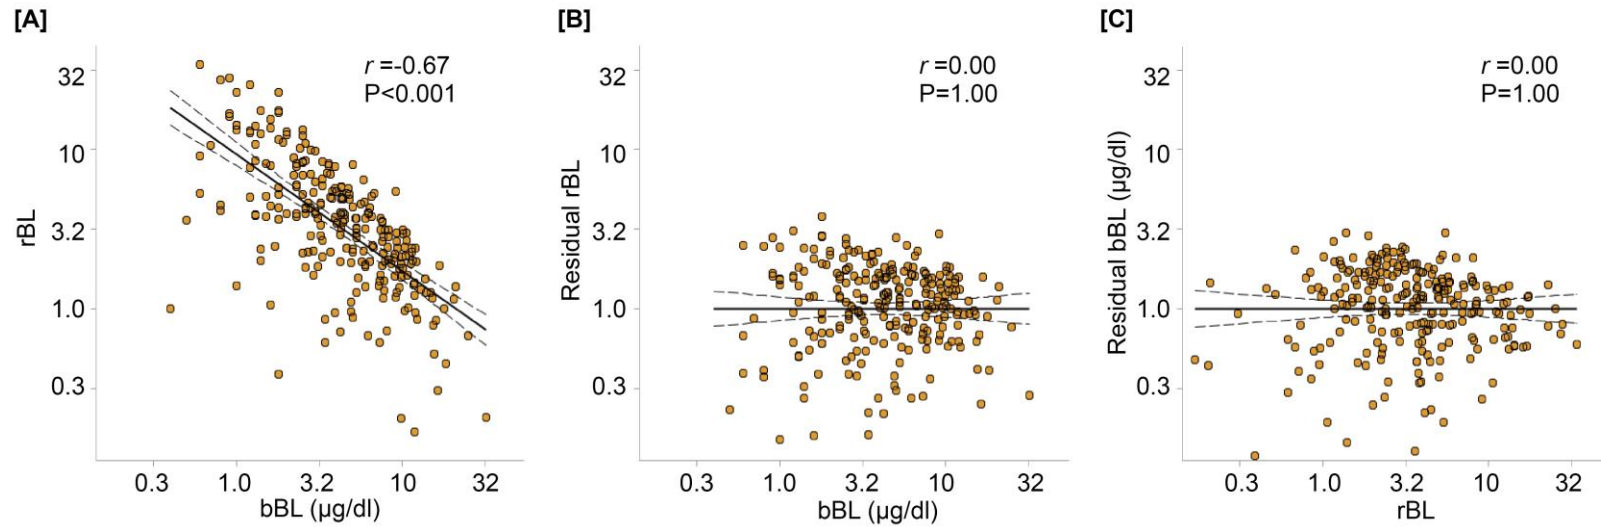**Figure S2**

Linear associations between baseline blood lead (bBL) and the last-follow-up-to-baseline BL ratio (rBL; panel A), between bBL and the residual of rBL regressed on bBL (panel B), and rBL and between the residual of bBL regressed on rBL (panel C). The regression lines are given with 95% confidence interval for the prediction of the mean of the dependent variable at any level of the explanatory variable. The residuals remove any variance in the dependent variable explained by the explanatory variable, as evidenced by the null correlation coefficients ( $r$ ) and the absence of any significance ( $P$ ) in panels B and C.

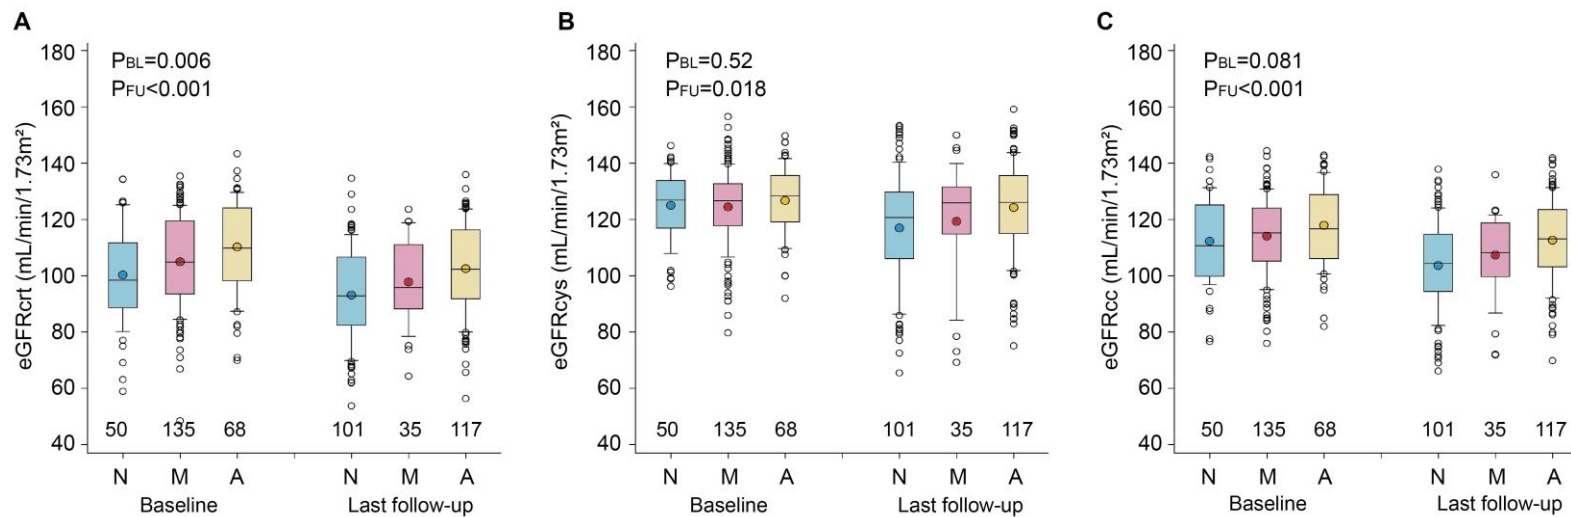

Figure S3

Boxplots showing the distributions of the glomerular filtration rate derived from serum creatinine (eGFRcrt; panel A), serum cystatin C (eGFRcys; panel B), or both serum creatinine and cystatin C (eGFRcc; panel C) by study phase (baseline and last follow-up) and by work shift (night [N], morning [M], and afternoon [A]). The central line, the upper and lower lines, and the upper and lower caps represent the median, interquartile range, and the 10th to 90th percentile interval. The arithmetic means and extreme measurements are represented by circles inside the box and outside the whiskers, respectively. The number of data points contributing to each whisker plot is given along the horizontal axis.  $P$  values denote the significance of the overall difference between the estimates of the glomerular filtration rate by time of day for baseline ( $P_{BL}$ ) and follow-up ( $P_{FU}$ ).

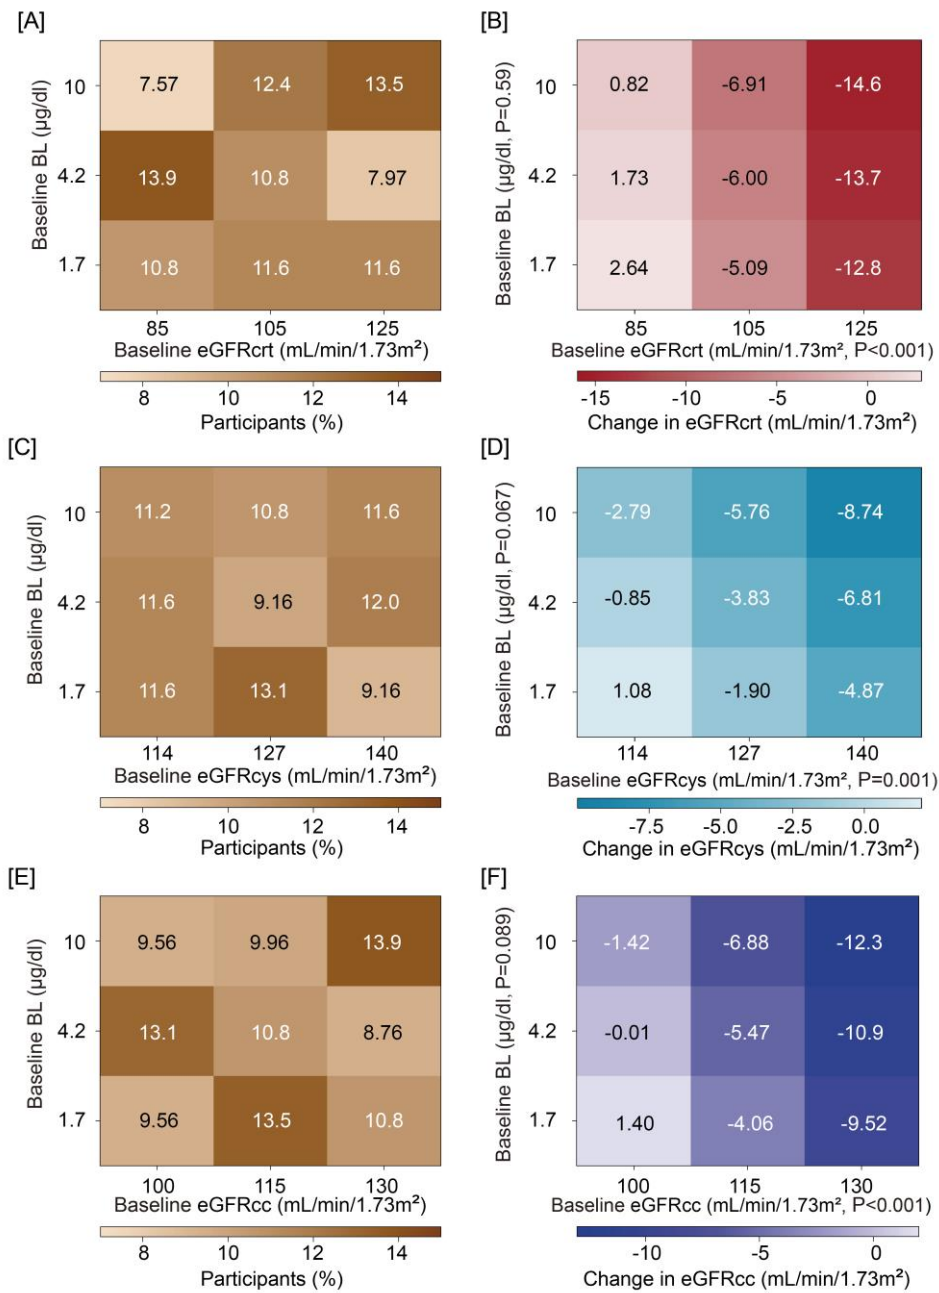**Figure S4**

**Heat maps relating the changes in glomerular filtration to their baseline values and the baseline blood lead (BL) concentration.** Participants were cross-classified by thirds of the distributions of the baseline BL and the baseline glomerular filtration rate derived from serum creatinine (eGFRcr; panels A and B), serum cystatin C (eGFRcys; panels C and D) or both (eGFRcc; panels E and F). The percentage of participants contributing to each cell of heat maps is given in panels A, C, and E. Associations sizes are point estimates corresponding with the thick marks and were derived from fully adjusted mixed models, which accounted for sex, age, follow-up duration, the time of day of blood sampling (daytime vs nighttime), body mass index, change in body weight, the follow-up-to-baseline BL ratio, and the baseline values of and changes during follow-up in smoking status, mean arterial pressure, antihypertensive medication (yes vs no), total-to-HDL cholesterol ratio, and  $\gamma$ -glutamyltransferase. The *P*-values of the interaction terms between baseline BL and the baseline eGFR were 0.50, 0.11 and 0.70 for eGFRcr (B), eGFRcys (E) and eGFRcc (F), respectively.

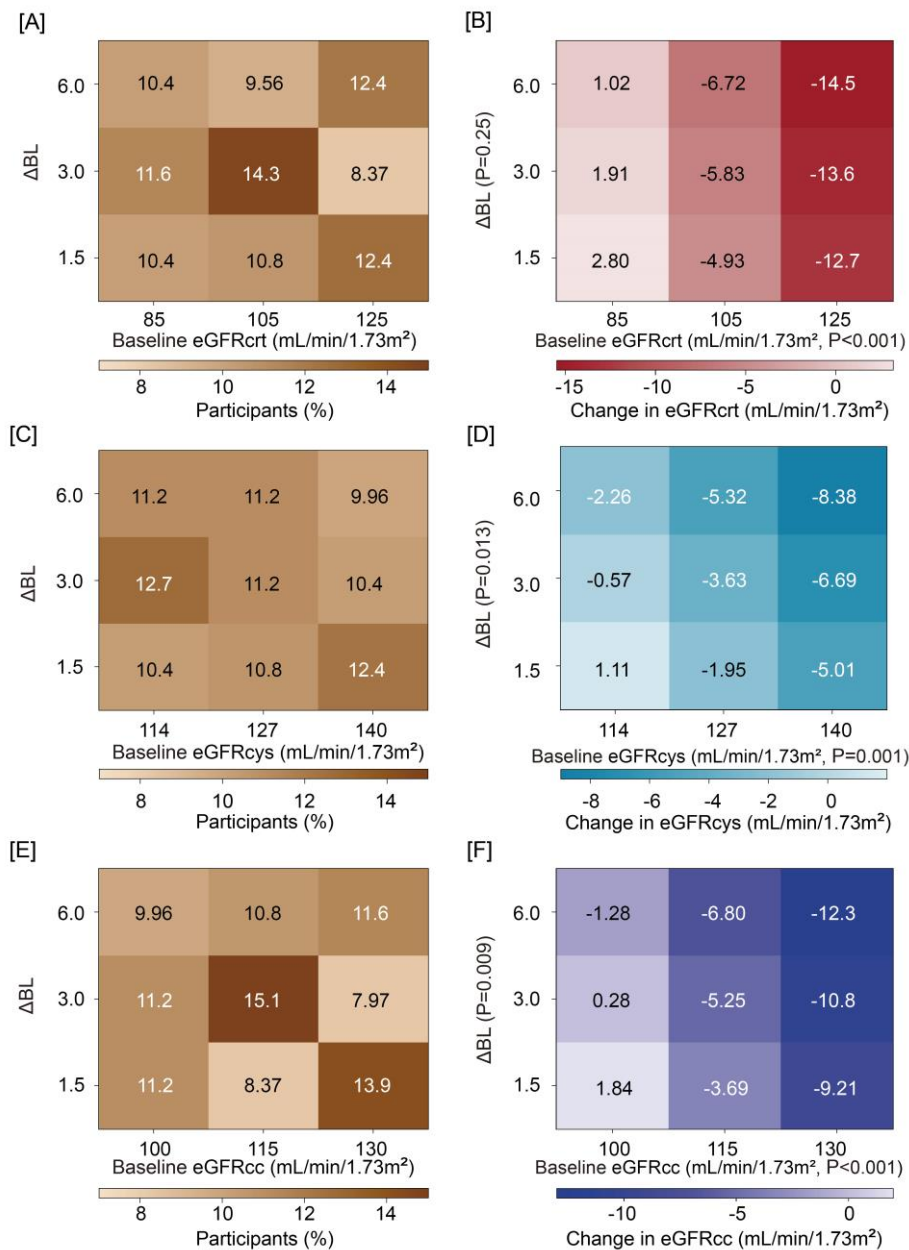**Figure S5**

**Heat maps relating the changes in glomerular filtration to their baseline values and the follow-up-to-baseline blood lead (BL) concentration ratio.** Participants were cross-classified by thirds of the distributions of the follow-up-to-baseline BL ratio and the baseline glomerular filtration rate derived from serum creatinine (eGFR<sub>cr</sub>; panels A and B), serum cystatin C (eGFR<sub>cys</sub>; panels C and D) or both (eGFR<sub>cc</sub>; panels E and F). The percentage of participants contributing to each cell of heat maps is given in panels A, C, and E. Associations sizes are point estimates corresponding with the thick marks and were derived from fully adjusted mixed models, which accounted for sex, age, follow-up duration, the time of day of blood sampling (daytime vs nighttime), body mass index, change in body weight, baseline BL, and the baseline values of and changes during follow-up in smoking status, mean arterial pressure, antihypertensive medication (yes vs no), the total-to-HDL cholesterol ratio, and  $\gamma$ -glutamyltransferase. The *P*-values of the interaction terms between the follow-up-to-baseline BL ratio and the baseline eGFR were 0.65, 0.33 and 0.85 for eGFR<sub>cr</sub> (B), eGFR<sub>cys</sub> (E) and eGFR<sub>cc</sub> (F), respectively.
